# Supplementary material for: Heterogeneous catalysis of water oxidation supported by a novel metallamacrocycle
Source: Royal Society of Chemistry journal article supplement (doi:10.1039/c5nj02931g), 2016-01-01
Supplement: c5nj02931g1.pdf [file c5nj02931g1.pdf]

## Electronic Supplementary Information

### **Homo-/Heterogeneous Catalysis of Water Oxidation**

#### **Supported by a Novel Metallamacrocycle**

Wei-Bin Yu\*, Qing-Ya He, Hua-Tian Shi, and Xianwen Wei

1.Fig. s1. IR spectra of complexes **1**, **2** and ligand.

2.Fig. s2. Ms spectrum of complex **1**.

3.Fig. s3. Ms spectrum of complex **2**.

4.Fig. s4. TGA curves of complex **1** and **2**.

5.Fig. s5.  $^1\text{H}$  NMR spectra of **1**.

6.Fig. s6 .  $^{13}\text{C}$  NMR of **1**.

7.Fig. s7.  $^{19}\text{F}$  NMR of **1**

8.Fig. s8.  $^1\text{H}$  NMR of **2**.

9.Fig. s9.  $^{13}\text{C}$  NMR of **2**.

10.Fig. s10.  $^{19}\text{F}$  NMR of **2**.

11.Fig. s11.  $^1\text{H}$  NMR of ligand.

12.Fig. s12.  $^{13}\text{C}$  NMR of ligand.

13.Fig. s13. Oxygen pressure of water oxidation.

13.Table 1. Crystal data and structure refinement for **1**.

14.Table 2. Crystal data and structure refinement for **2**.

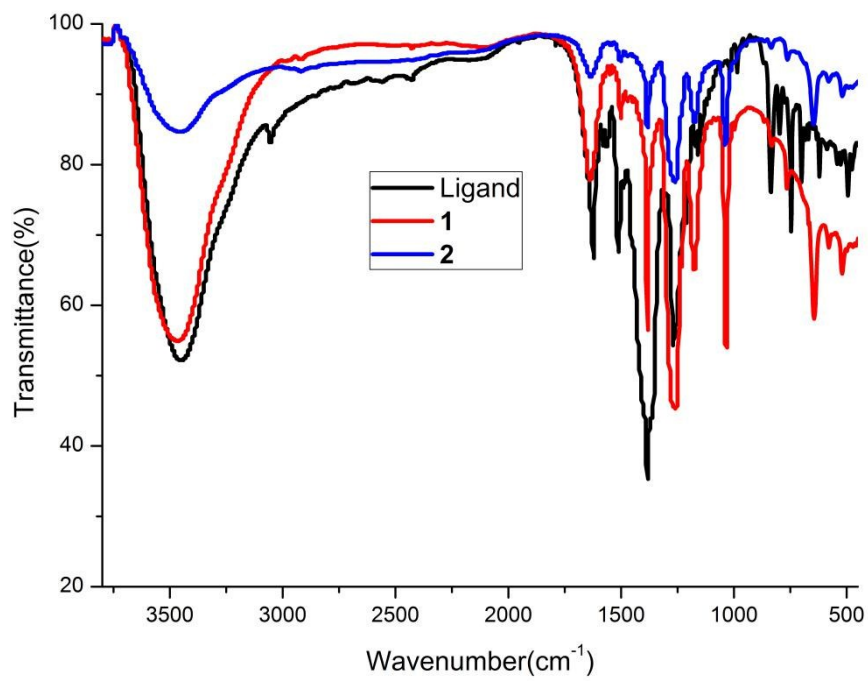

Fig. s1. IR spectra of complexes **1**, **2** and ligand.

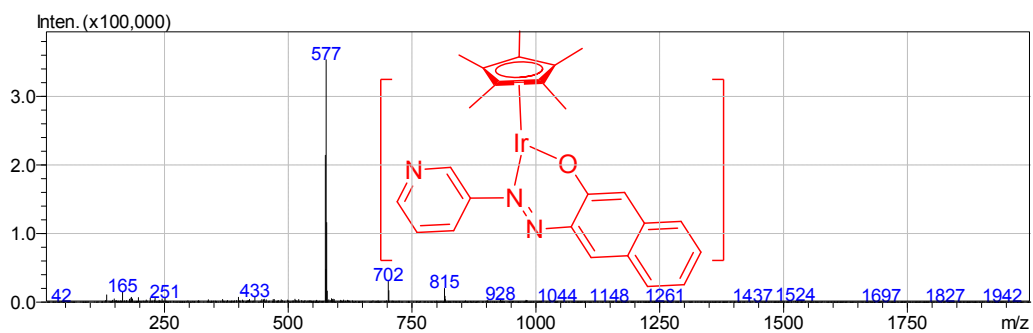

Fig. s2. Ms spectrum of complex 1.

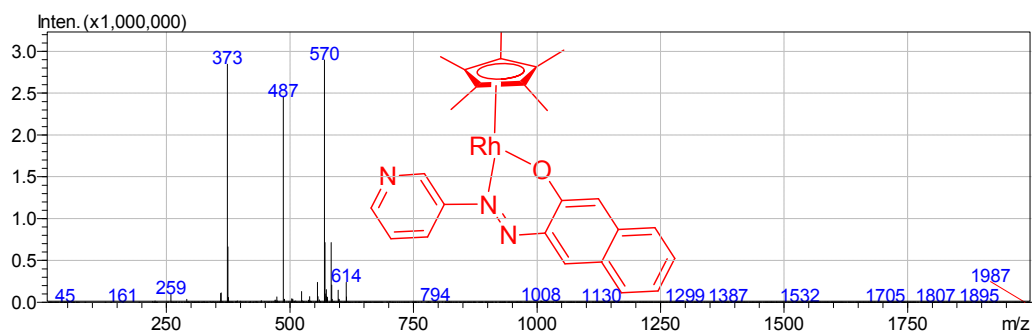

Fig. s3. Ms spectrum of complex 2.

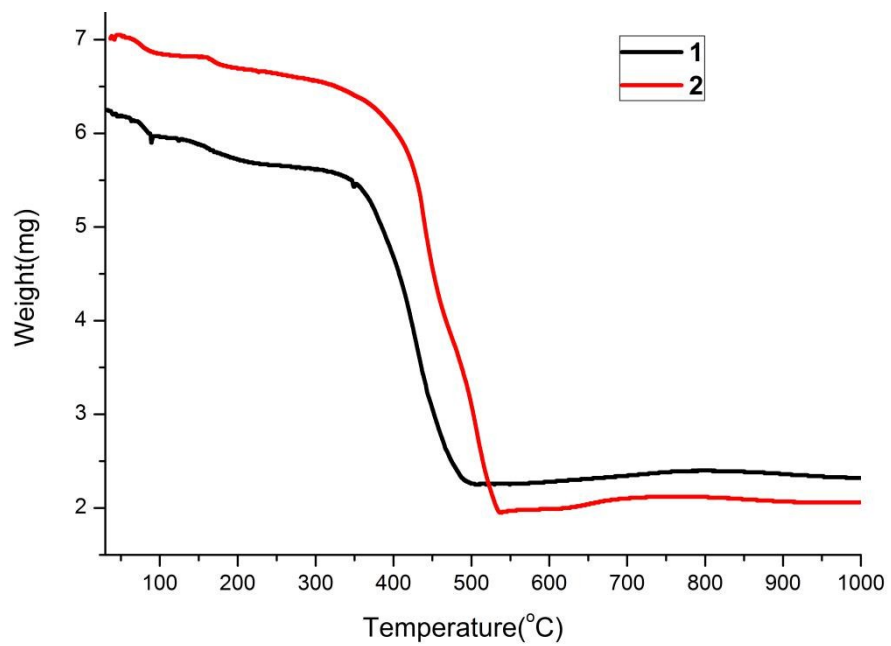

Fig. s4. TGA curves of complex **1** and **2**.

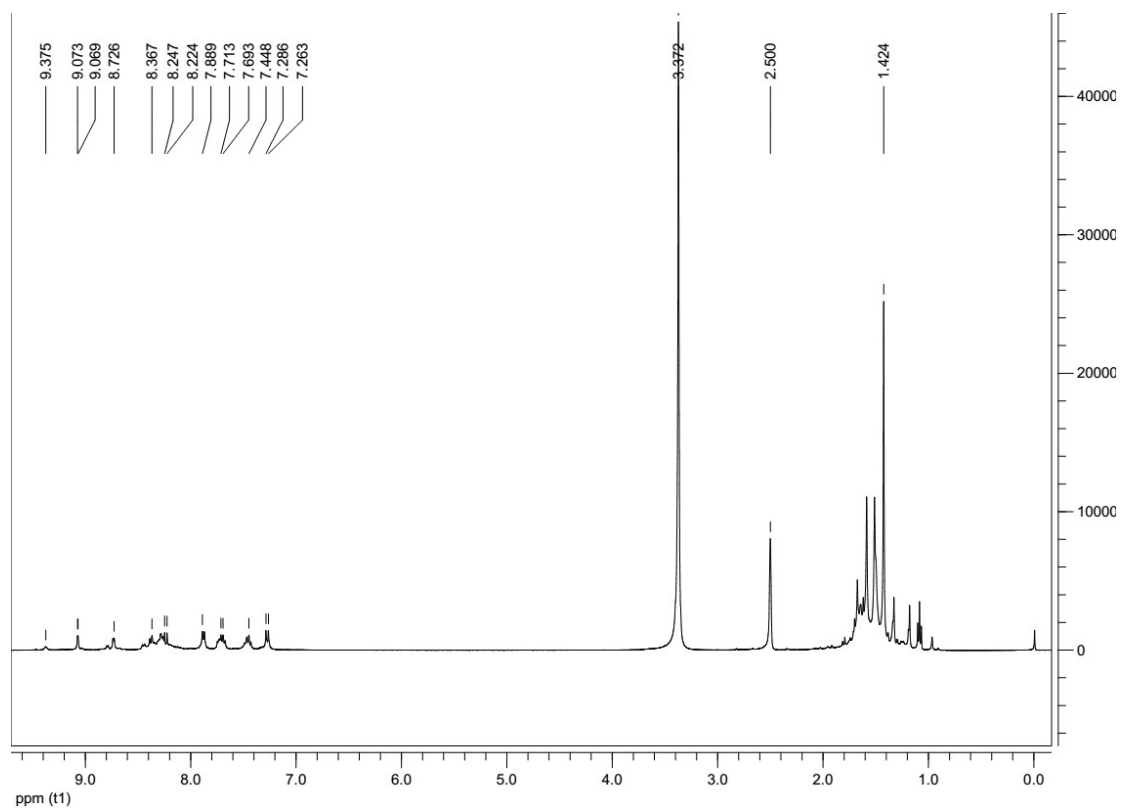

Fig. s5. <sup>1</sup>H NMR spectra of 1.

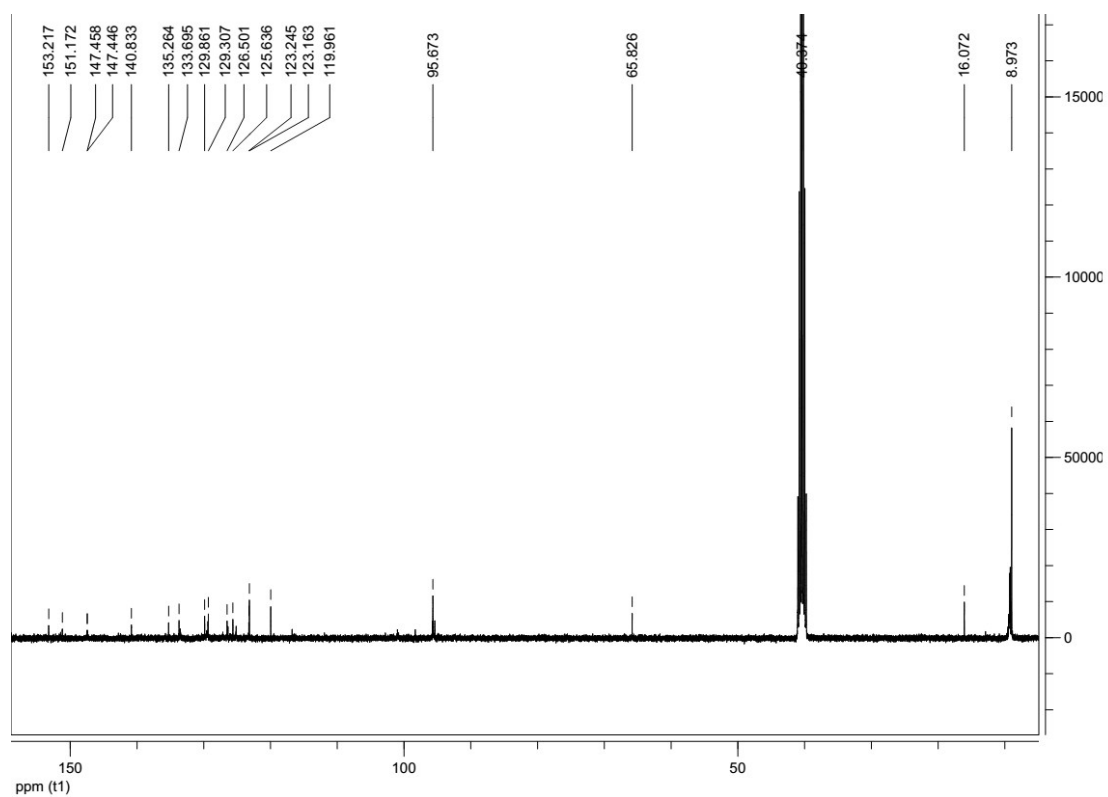

Fig. s6 . <sup>13</sup>C NMR of 1.

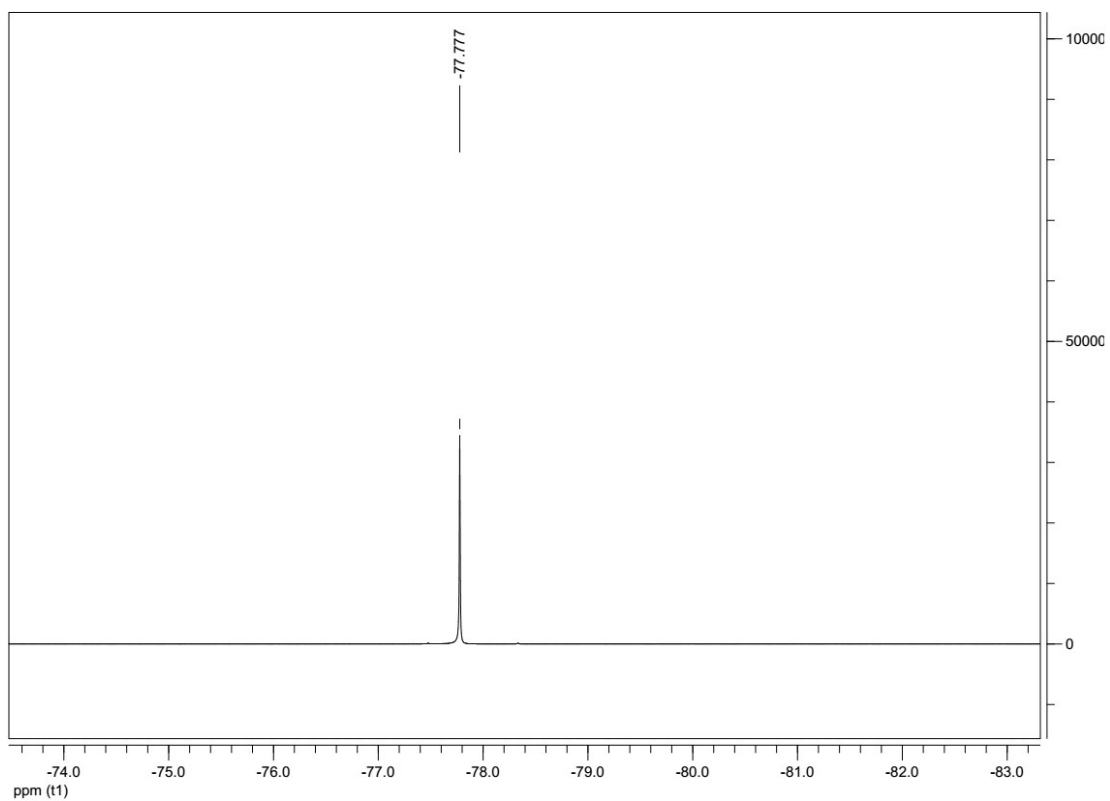

Fig. s7.  $^{19}\text{F}$  NMR of **1**

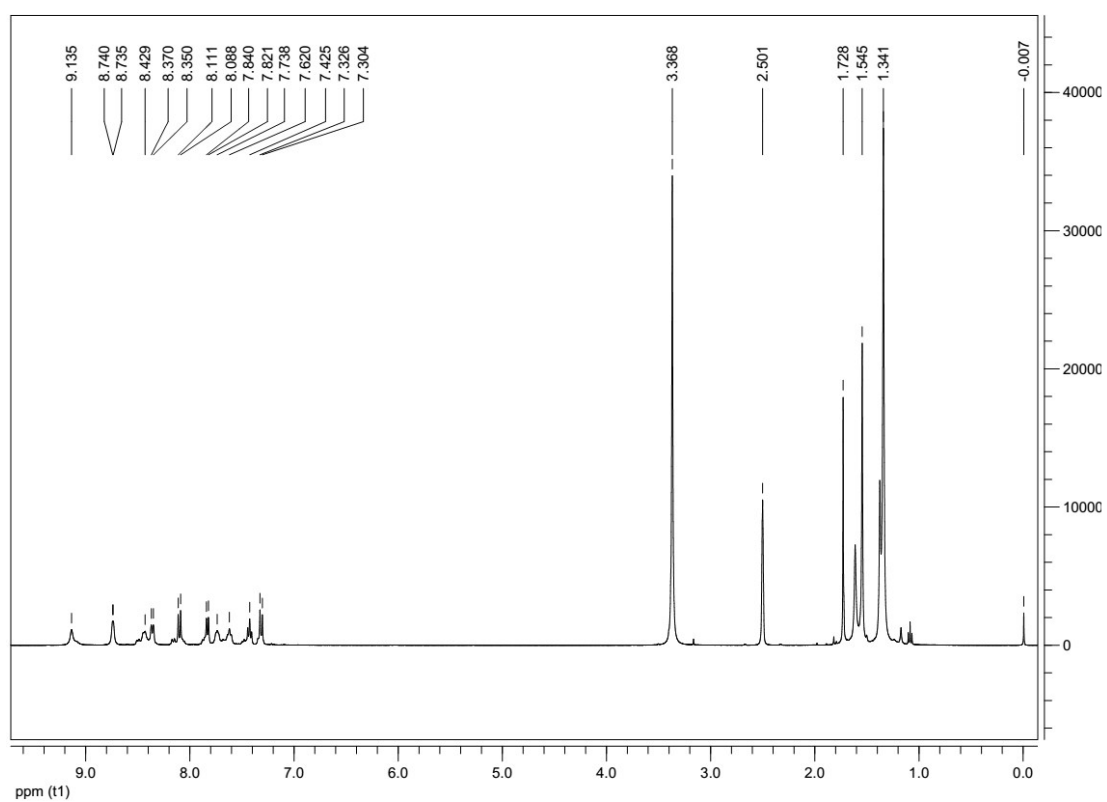

Fig. s8.  $^1\text{H}$  NMR of **2**.

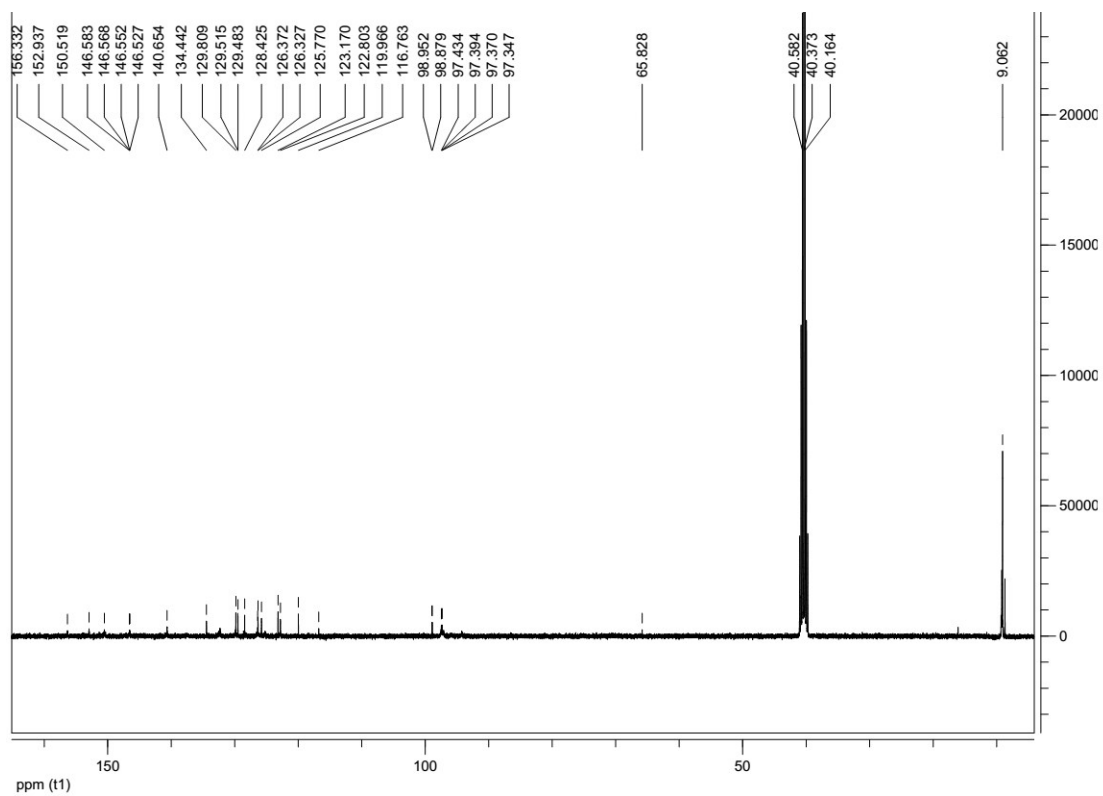

Fig. s9.  $^{13}\text{C}$  NMR of **2**.

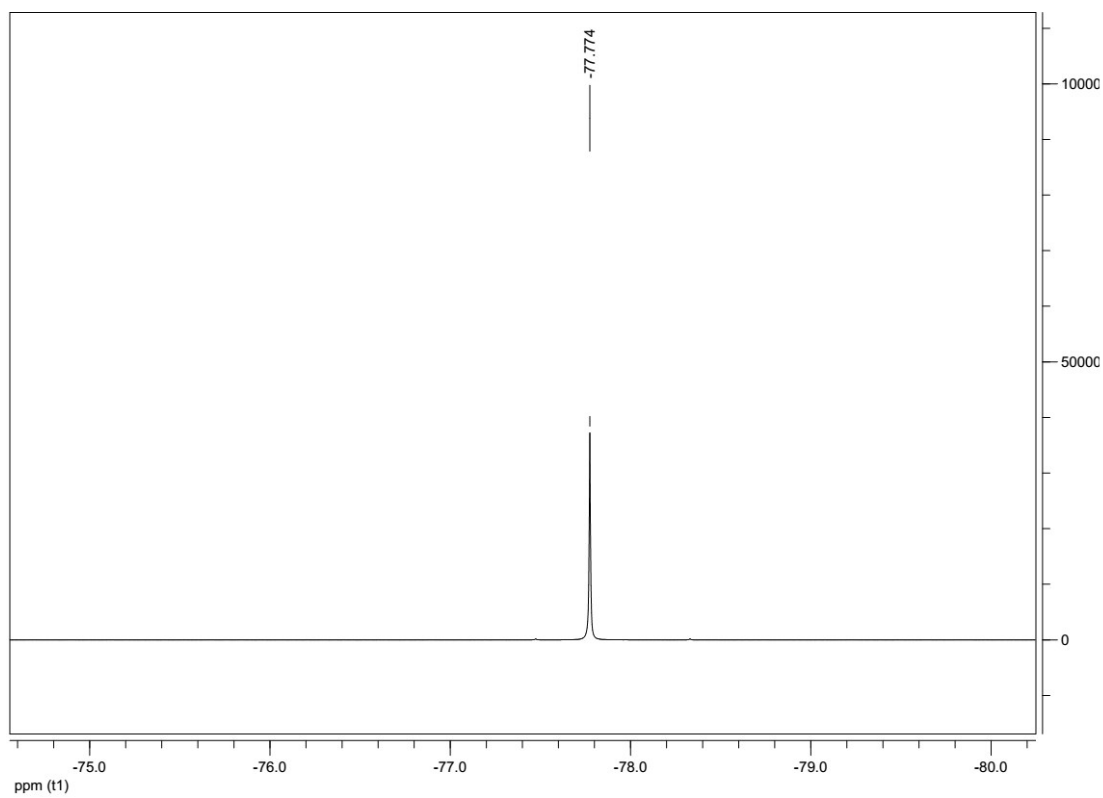

Fig. s10.  $^{19}\text{F}$  NMR of **2**.

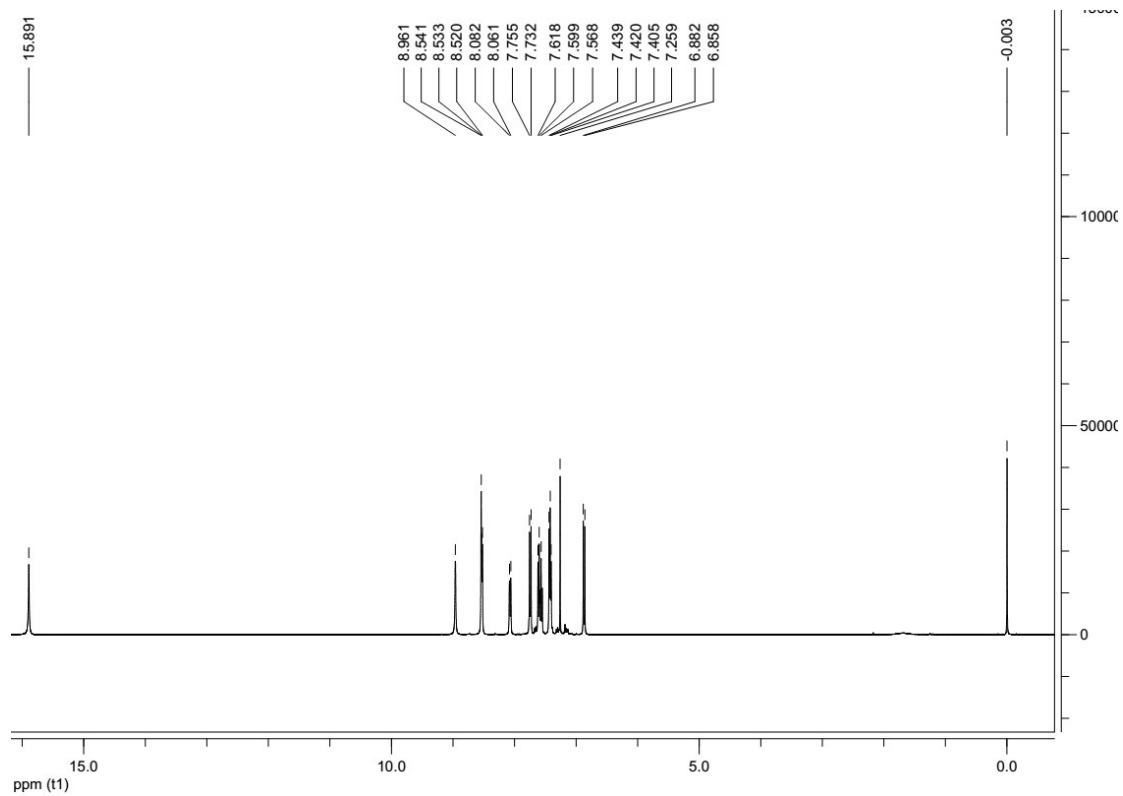

Fig. s11. <sup>1</sup>H NMR of ligand.

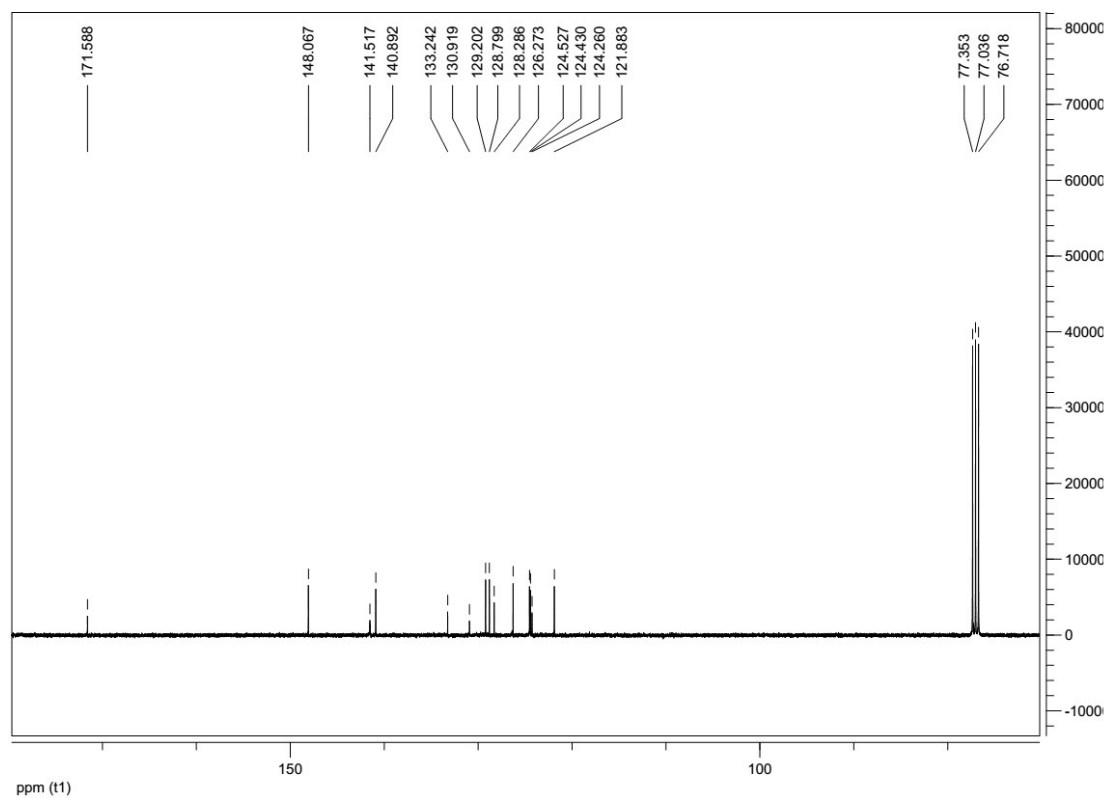

Fig. s12. <sup>13</sup>C NMR of ligand.



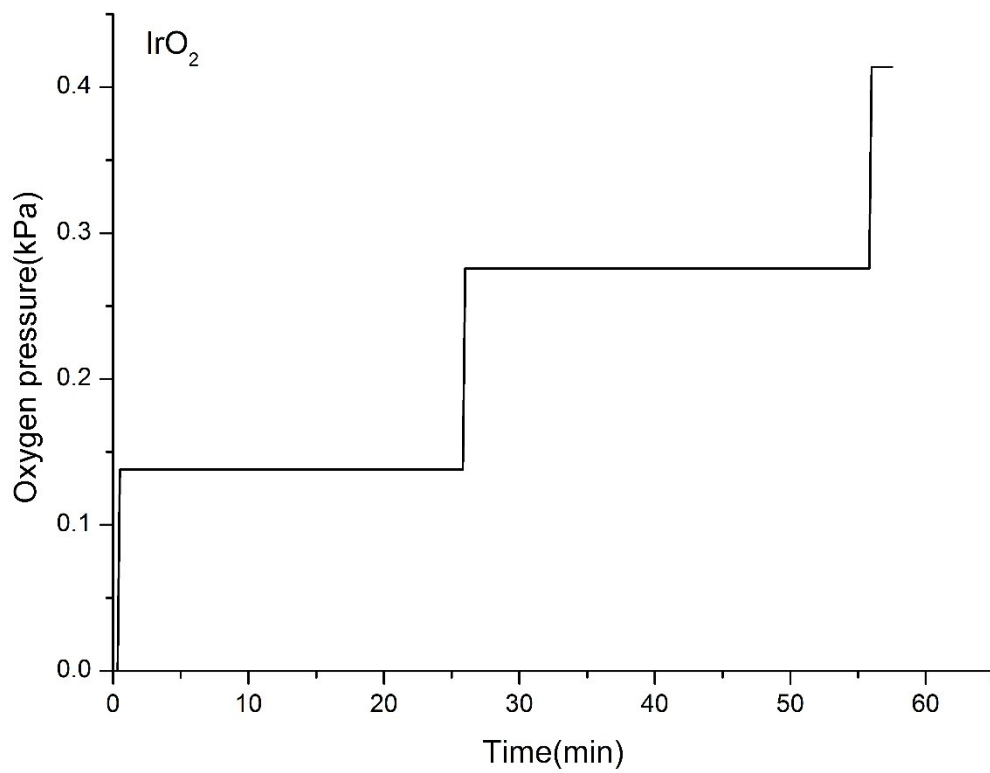

Fig.s12 Oxygen pressure of water oxidation.

|                                 |                                                                                                                        |
|---------------------------------|------------------------------------------------------------------------------------------------------------------------|
| Empirical formula               | $C_{104}H_{100}F_{12}Ir_4N_{12}O_{16}S_4$                                                                              |
| Formula weight                  | 2899.00                                                                                                                |
| Temperature                     | 296(2) K                                                                                                               |
| Wavelength                      | 0.71073 Å                                                                                                              |
| Crystal system, space group     | Monoclinic, $P2(1)/n$                                                                                                  |
| Unit cell dimensions            | a = 14.964(8) Å    alpha = 90 deg.<br>b = 24.495(14) Å    beta = 109.982(6) deg.<br>c = 15.987(9) Å    gamma = 90 deg. |
| Volume                          | 5507(5) Å <sup>3</sup>                                                                                                 |
| Z, Calculated density           | 2, 1.748 Mg/m <sup>3</sup>                                                                                             |
| Absorption coefficient          | 4.981 mm <sup>-1</sup>                                                                                                 |
| F(000)                          | 2832                                                                                                                   |
| Crystal size                    | 0.25 x 0.22 x 0.20 mm                                                                                                  |
| Theta range for data collection | 2.21 to 27.40 deg.                                                                                                     |
| Limiting indices                | -16 ≤ h ≤ 19, -19 ≤ k ≤ 31, -20 ≤ l ≤ 20                                                                               |

|                                   |                                             |
|-----------------------------------|---------------------------------------------|
| Reflections collected / unique    | 31830 / 12186 [R(int) = 0.1263]             |
| Completeness to theta = 27.71     | 97.3 %                                      |
| Max. and min. transmission        | 0.4357 and 0.3690                           |
| Refinement method                 | Full-matrix least-squares on F <sup>2</sup> |
| Data / restraints / parameters    | 12186 / 732 / 680                           |
| Goodness-of-fit on F <sup>2</sup> | 0.949                                       |
| Final R indices [I>2sigma(I)]     | R1 = 0.0907, wR2 = 0.2306                   |
| R indices (all data)              | R1 = 0.1856, wR2 = 0.2917                   |
| Largest diff. peak and hole       | 3.591 and -2.681 e.A <sup>-3</sup>          |

Table 1. Crystal data and structure refinement for **1**.

|                                   |                                                                                                                       |
|-----------------------------------|-----------------------------------------------------------------------------------------------------------------------|
| Empirical formula                 | C <sub>52</sub> H <sub>50</sub> F <sub>6</sub> N <sub>6</sub> O <sub>8</sub> Rh <sub>2</sub> S <sub>2</sub>           |
| Formula weight                    | 1270.92                                                                                                               |
| Temperature                       | 296(2) K                                                                                                              |
| Wavelength                        | 0.71073 Å                                                                                                             |
| Crystal system, space group       | Monoclinic, P2(1)/n                                                                                                   |
| Unit cell dimensions              | a = 14.940(4) Å    alpha = 90 deg.<br>b = 24.403(6) Å    beta = 109.611(3) deg.<br>c = 15.917(4) Å    gamma = 90 deg. |
| Volume                            | 5467(2) Å <sup>3</sup>                                                                                                |
| Z, Calculated density             | 4, 1.544 Mg/m <sup>3</sup>                                                                                            |
| Absorption coefficient            | 0.758 mm <sup>-1</sup>                                                                                                |
| F(000)                            | 2576                                                                                                                  |
| Crystal size                      | 0.22 x 0.18 x 0.15 mm                                                                                                 |
| Theta range for data collection   | 2.15 to 27.68 deg.                                                                                                    |
| Limiting indices                  | -19 ≤ h ≤ 19, -31 ≤ k ≤ 30, -19 ≤ l ≤ 20                                                                              |
| Reflections collected / unique    | 33536 / 12591 [R(int) = 0.0606]                                                                                       |
| Completeness to theta = 27.71     | 98.5 %                                                                                                                |
| Max. and min. transmission        | 0.8948 and 0.8510                                                                                                     |
| Refinement method                 | Full-matrix least-squares on F <sup>2</sup>                                                                           |
| Data / restraints / parameters    | 12591 / 731 / 695                                                                                                     |
| Goodness-of-fit on F <sup>2</sup> | 1.096                                                                                                                 |
| Final R indices [I > 2σ(I)]       | R1 = 0.0721, wR2 = 0.1872                                                                                             |
| R indices (all data)              | R1 = 0.1206, wR2 = 0.2075                                                                                             |
| Largest diff. peak and hole       | 1.647 and -1.099 e.Å <sup>-3</sup>                                                                                    |

Table 2. Crystal data and structure refinement for **2**.
